# Supplementary material
Source: MDPI journal article supplement (https://www.mdpi.com/2075-163X/12/7/869)
Supplement: s1 [file s1]

ICP-MS&amp;ICP-AES reference value: 1967 ppm

**Table S2.** Summary the Ta concentrations (ppm) of the Penouta ore pellets obtained by LA-ICP-MS spot analysis following pellet production using different drying techniques. The values are based on data normalized to CaO as an internal standard. SD=Standard deviation, rep=repeated analytical run.

| Binder/Homogenization Time               |                 | 1        | 2      | 3      | 4      | 5      | Mean   | SD    |
|------------------------------------------|-----------------|----------|--------|--------|--------|--------|--------|-------|
|                                          |                 | Ta (ppm) |        |        |        |        |        |       |
| Freeze-dried (FD)                        | No binder       | 86.56    | 70.07  | 99.96  | 79.60  | 100.90 | 87.42  | 13.25 |
|                                          | 1 min           | 152.53   | 132.45 | 144.03 | 150.98 | 180.88 | 152.17 | 17.90 |
|                                          | 5 min           | 89.07    | 109.21 | 90.52  | 101.62 | 124.50 | 102.98 | 14.60 |
|                                          | 10 min          | 161.21   | 170.56 | 176.03 | 196.37 | 124.55 | 165.74 | 26.38 |
|                                          | No binder (rep) | 91.39    | 81.30  | 93.75  | 99.14  | 119.73 | 97.06  | 14.23 |
| Vacuum filtration with membrane (VDMF)   | No binder       | 105.90   | 85.68  | 104.93 | 173.73 | 82.10  | 110.47 | 36.99 |
|                                          | 1 min           | 94.27    | 102.70 | 92.02  | 175.98 | 114.16 | 115.83 | 34.73 |
|                                          | No binder (rep) | 130.57   | 77.00  | 146.85 | 207.88 | 88.03  | 130.07 | 52.25 |
| Vacuum driven sterile filter (VDSF)      | 1 min           | 73.26    | 78.32  | 80.11  | 89.79  | 78.56  | 80.01  | 6.05  |
|                                          | 5 min           | 84.64    | 88.31  | 87.26  | 81.36  | 100.03 | 88.32  | 7.08  |
|                                          | 10 min          | 73.44    | 70.37  | 78.03  | 71.72  | 71.10  | 72.93  | 3.07  |
| Evaporation (E)                          | 1 min           | 115.51   | 124.61 | 110.20 | 125.21 | 125.32 | 120.17 | 6.94  |
|                                          | 5 min           | 72.15    | 91.73  | 78.54  | 142.97 | 95.28  | 96.13  | 27.83 |
|                                          | 10 min          | 126.85   | 133.66 | 121.27 | 145.03 | n.a.   | 131.70 | 10.23 |
| ICP-MS&ICP-AES reference value: 97.3 ppm |                 |          |        |        |        |        |        |       |

**Table S3.** Summary of the Nb concentrations (ppm) of the Penouta ore pellets obtained by LA-ICP-MS spot analysis following pellet production using different drying techniques. The values are based on data normalized to CaO as an internal standard. SD=Standard deviation, rep=repeated analytical run.

| Binder/Homogenization Time               |                 | 1        | 2      | 3     | 4      | 5      | Mean   | SD    |
|------------------------------------------|-----------------|----------|--------|-------|--------|--------|--------|-------|
|                                          |                 | Nb (ppm) |        |       |        |        |        |       |
| Freeze-dried (FD)                        | No binder       | 83.38    | 61.97  | 85.00 | 64.76  | 90.86  | 77.19  | 12.96 |
|                                          | 1 min           | 79.44    | 80.10  | 82.00 | 81.73  | 104.93 | 85.64  | 10.84 |
|                                          | 5 min           | 70.44    | 68.54  | 60.25 | 69.94  | 79.16  | 69.67  | 6.72  |
|                                          | 10 min          | 70.75    | 77.88  | 83.36 | 92.05  | 74.23  | 79.65  | 8.36  |
|                                          | No binder (rep) | 74.88    | 72.81  | 75.18 | 76.88  | 95.37  | 79.02  | 9.25  |
| Vacuum filtration with membrane (VDMF)   | No binder       | 88.12    | 74.03  | 95.17 | 166.68 | 69.84  | 98.77  | 39.33 |
|                                          | 1 min           | 66.27    | 101.57 | 65.75 | 90.63  | 93.45  | 83.53  | 16.49 |
|                                          | No binder (rep) | 89.84    | 70.39  | 95.26 | 129.43 | 119.06 | 100.80 | 23.60 |
| Vacuum driven sterile filter (VDSF)      | 1 min           | 69.94    | 69.83  | 73.24 | 75.41  | 71.55  | 71.99  | 2.36  |
|                                          | 5 min           | 63.12    | 133.43 | 68.23 | 69.52  | 73.65  | 81.59  | 29.22 |
|                                          | 10 min          | 65.4     | 65.71  | 66.92 | 63.83  | 65.48  | 65.47  | 1.10  |
| Evaporation (E)                          | 1 min           | 75.79    | 78.73  | 71.99 | 80.55  | 80.57  | 77.53  | 3.66  |
|                                          | 5 min           | 59.32    | 93.42  | 59.41 | 152.97 | 66.67  | 86.36  | 39.79 |
|                                          | 10 min          | 72.61    | 57.42  | 58.42 | 82.95  | n.a.   | 67.85  | 12.23 |
| ICP-MS&ICP-AES reference value: 58.2 ppm |                 |          |        |       |        |        |        |       |

**Table S4.** Summary of the Sn concentrations (ppm) of the Penouta ore pellets obtained by LA-ICP-MS spot analysis following pellet production using different drying techniques. The values are based on data normalized to CaO as an internal standard. SD=Standard deviation, rep=repeated analytical run.

|                                         | Binder/Homogenization Time | 1      | 2      | Spots 3  | 4      | 5      | Mean   | SD     |
|-----------------------------------------|----------------------------|--------|--------|----------|--------|--------|--------|--------|
|                                         |                            |        |        | Sn (ppm) |        |        |        |        |
| Freeze-dried (FD)                       | No binder                  | 303.18 | 278.58 | 356.71   | 241.96 | 286.66 | 293.42 | 41.88  |
|                                         | 1 min                      | 494.13 | 396.89 | 323.19   | 398.33 | 614.53 | 445.41 | 112.34 |
|                                         | 5 min                      | 279.45 | 242.60 | 257.97   | 279.19 | 288.86 | 269.61 | 18.87  |
|                                         | 10 min                     | 335.78 | 392.66 | 417.40   | 357.31 | 364.43 | 373.52 | 31.86  |
|                                         | No binder (rep)            | 253.53 | 256.51 | 253.61   | 242.81 | 265.92 | 254.48 | 8.26   |
| Vacuum filtration with membrane (VDMF)  | No binder                  | 345.30 | 347.54 | 369.97   | 350.57 | 403.64 | 363.40 | 24.53  |
|                                         | 1 min                      | 406.30 | 312.92 | 434.97   | 339.16 | 472.76 | 393.22 | 66.35  |
|                                         | No binder (rep)            | 464.43 | 424.68 | 313.43   | 479.78 | 463.59 | 429.18 | 67.83  |
| Vacuum driven sterile filter (VDSF)     | 1 min                      | 327.35 | 265.62 | 317.03   | 302.39 | 282.52 | 298.98 | 25.13  |
|                                         | 5 min                      | 272.34 | 309.46 | 270.52   | 261.03 | 292.43 | 281.16 | 19.52  |
|                                         | 10 min                     | 275.16 | 261.70 | 273.22   | 276.03 | 270.37 | 271.30 | 5.79   |
| Evaporation (E)                         | 1 min                      | 436.07 | 414.11 | 384.42   | 334.10 | 372.05 | 388.15 | 39.26  |
|                                         | 5 min                      | 292.70 | 367.44 | 282.22   | 340.44 | 296.17 | 315.79 | 36.47  |
|                                         | 10 min                     | 350.07 | 295.40 | 311.89   | 281.04 | n.a.   | 309.60 | 29.78  |
| ICP-MS&ICP-AES reference value: 329 ppm |                            |        |        |          |        |        |        |        |
